# Supplementary material
Source: PubMed Central journal article supplement (PMC5815872)
Supplement: mmc1.pdf [file mmc1.pdf]

# Asthma Is a Risk Factor for Respiratory Exacerbations Without Increased Rate of Lung Function Decline

## Five-Year Follow-up in Adult Smokers From the COPDGene Study

*Lystra P. Hayden, MD, MMSc; Megan E. Hardin, MD, MPH; Weiliang Qiu, PhD; David A. Lynch, MD; Matthew J. Strand, PhD; Edwin J. van Beek, MD, PhD; James D. Crapo, MD; Edwin K. Silverman, MD, PhD; Craig P. Hersh, MD, MPH; on behalf of the COPDGene Investigators*

CHEST 2018; 153(2):368-377

*Online supplements are not copyedited prior to posting and the author(s) take full responsibility for the accuracy of all data.*

© 2017 AMERICAN COLLEGE OF CHEST PHYSICIANS. Reproduction of this article is prohibited without written permission from the American College of Chest Physicians. See online for more details. DOI: 10.1016/j.chest.2017.11.038

### **e-Appendix 1: Institutional Review Board Approval**

This study was conducted in accordance with the amended Declaration of Helsinki. This study obtained approval from the Institutional Review Board at Brigham and Women's Hospital and at each of the twenty-one clinical sites. All participants provided written informed consent for their medical data to be used prior to taking part in the study.

#### Clinical Center and IRB protocol numbers:

Ann Arbor VA, Ann Arbor, MI (PCC 2008-110732)

Baylor College of Medicine, Houston, TX (H-22209)

Brigham and Women's Hospital, Boston, MA (2007-P-000554/2; BWH)

Columbia University, New York, NY (IRB-AAAC9324)

Duke University Medical Center, Durham, NC (Pro00004464)

Health Partners Research Foundation, Minneapolis, MN (07-127)

Johns Hopkins University, Baltimore, MD (NA\_00011524)

Los Angeles Biomedical Research Institute at Harbor UCLA Medical Center, Los Angeles, CA (12756-01)

Michael E. DeBakey VAMC, Houston, TX (H-22202)

Minneapolis VA, Minneapolis, MN (4128-A)

Morehouse School of Medicine, Atlanta, GA (07-1029)

National Jewish Health, Denver, CO (HS-1883a)

Reliant Medical Group, Worcester, MA (1143)

Temple University, Philadelphia, PA (11369)

University of Alabama, Birmingham, AL (FO70712014)

University of California, San Diego, CA (70876)

University of Iowa, Iowa City, IA (200710717)

University of Michigan, Ann Arbor, MI (HUM00014973)

University of Minnesota, Minneapolis, MN (0801M24949)

University of Pittsburgh, Pittsburgh, PA (PRO07120059)

University of Texas Health Science Center at San Antonio, San Antonio, TX (HSC20070644H)

**e-Figure 1: Flow Chart of Subjects Groupings For Each Analysis**

**Analysis (1)**

X

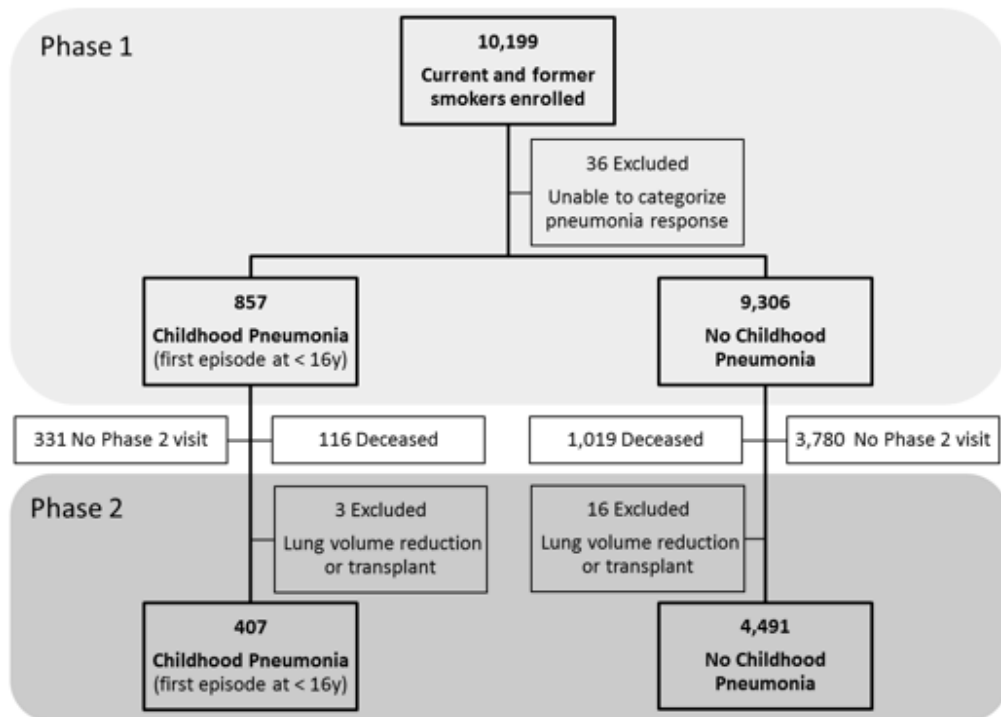

**Childhood pneumonia analysis:** Disease progression at Phase 2 in those with childhood pneumonia compared to those without childhood pneumonia.

**Analysis (2)**

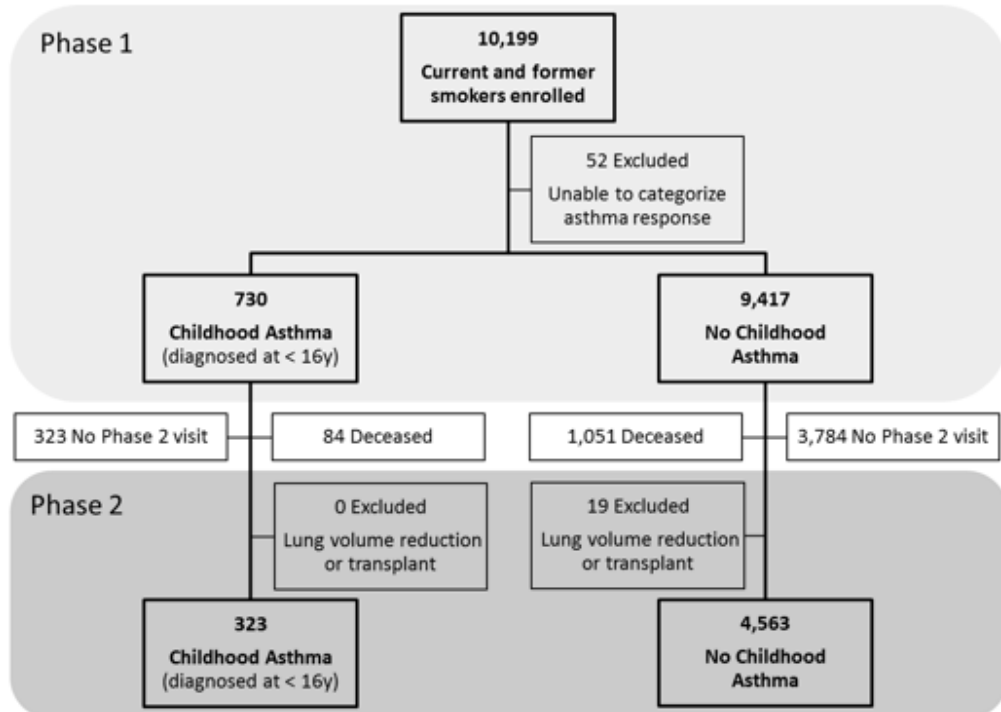

**Childhood asthma analysis:** Disease progression at Phase 2 in those with childhood asthma compared to those without childhood asthma.

Analysis (3)

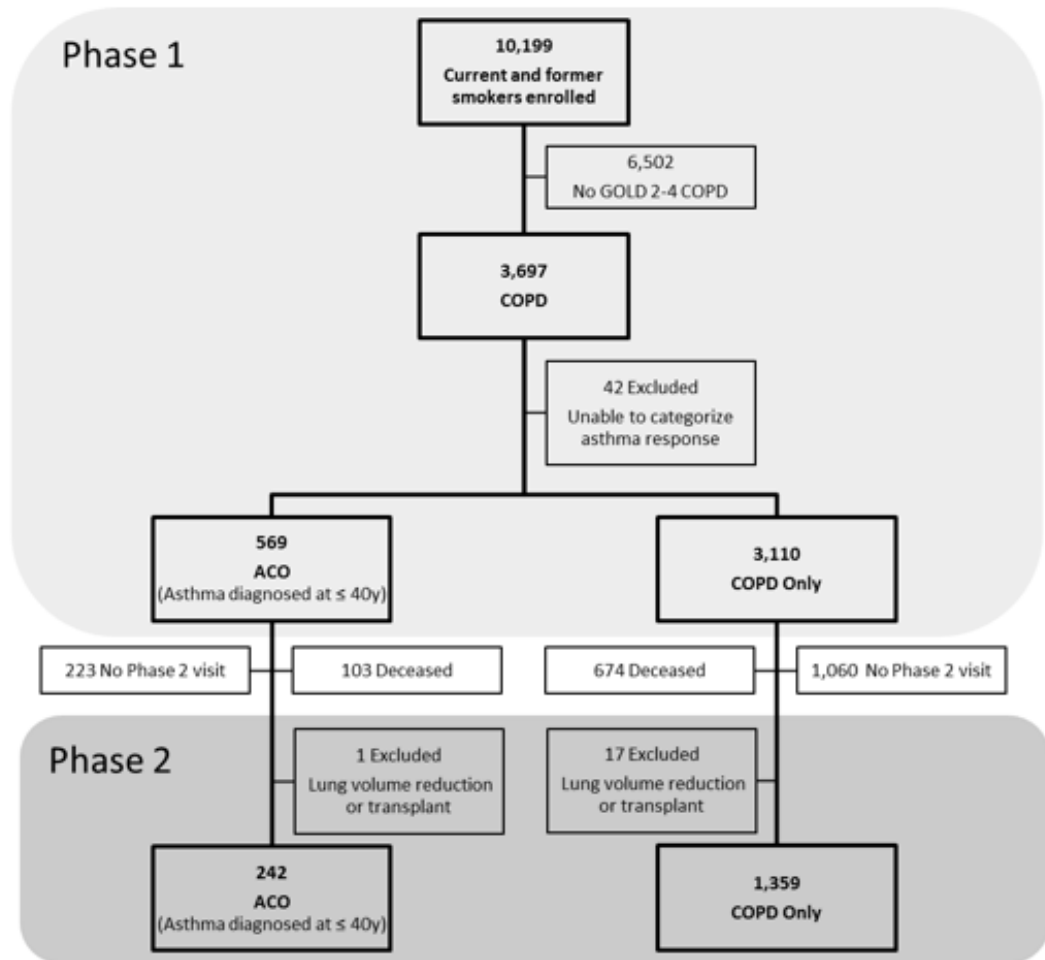

**Asthma COPD Overlap (ACO) analysis:** Disease progression at Phase 2 in those with ACO compared to those without COPD alone.

**e-Table 1: Disease Progression in Childhood Pneumonia, Childhood Asthma and ACO, Univariate Analysis**

|                                                                | Childhood Pneumonia | No Childhood Pneumonia | P      | Childhood Asthma | No Childhood Asthma | P      | ACO         | No ACO      | P      |
|----------------------------------------------------------------|---------------------|------------------------|--------|------------------|---------------------|--------|-------------|-------------|--------|
| Phase 1                                                        | N = 857             | N = 9306               |        | N = 730          | N = 9417            |        | N = 569     | N = 3110    |        |
| Deceased as of September 2016 (%) <sup>a</sup>                 | 116 (14%)           | 1019 (11%)             | 0.04   | 84 (12%)         | 1051 (11%)          | 0.44   | 103 (18%)   | 674 (22%)   | 0.19   |
| Phase 2 (%) <sup>a</sup>                                       | 407 (47%)           | 4491 (48%)             | 0.69   | 323 (44%)        | 4563 (48%)          | 0.03   | 242 (43%)   | 1359 (44%)  | 0.64   |
| <u>Lung Function and Clinical Symptoms</u>                     |                     |                        |        |                  |                     |        |             |             |        |
| Developed COPD (%) <sup>a</sup>                                | 30 (7%)             | 313 (7%)               | 0.84   | 27 (8%)          | 317 (7%)            | 0.40   | NA          | NA          |        |
| Developed oxygen requirement (%) <sup>a</sup>                  | 32 (8%)             | 286 (6%)               | 0.28   | 23 (7%)          | 295 (6%)            | 0.71   | 33 (14%)    | 207 (15%)   | 0.61   |
| Developed chronic bronchitis (%) <sup>a</sup>                  | 31 (8%)             | 359 (8%)               | 0.99   | 28 (9%)          | 359 (8%)            | 0.42   | 24 (10%)    | 155 (11%)   | 0.78   |
| Had a severe exacerbation in prior yr (%) <sup>a</sup>         | 48 (12%)            | 411 (9%)               | 0.10   | 52 (16%)         | 406 (9%)            | <0.001 | 60 (25%)    | 237 (17%)   | 0.009  |
| # of exacerbations in prior yr, mean (SD) <sup>b</sup>         | 0.42 (0.86)         | 0.30 (0.79)            | <0.001 | 0.59 (1.08)      | 0.29 (0.77)         | <0.001 | 0.81 (1.23) | 0.56 (1.03) | <0.001 |
| FEV <sub>1</sub> post-BD % predicted, mean Δ (SD) <sup>c</sup> | -1.64 (11)          | -1.98 (11)             | <0.001 | -1.48 (12)       | -1.98 (10)          | <0.001 | -2.53 (11)  | -2.64 (11)  | <0.001 |
| FEV <sub>1</sub> post-BD mL, mean Δ (SD) <sup>c</sup>          | -196 (279)          | -202 (287)             | <0.001 | -168 (303)       | -204 (284)          | <0.001 | -160 (313)  | -188 (306)  | <0.001 |
| FEV <sub>1</sub> post-BD mL/year, mean Δ (SD) <sup>c</sup>     | -36 (53)            | -37 (53)               | <0.001 | -31 (54)         | -38 (53)            | <0.001 | -30 (56)    | -35 (57)    | <0.001 |
| FVC post-BD % predicted, mean Δ (SD) <sup>c</sup>              | -1.83 (12)          | -2.11 (12)             | <0.001 | -0.73 (13)       | -2.15 (12)          | <0.001 | -2.81 (14)  | -3.69 (14)  | <0.001 |
| FVC post-BD mL, mean Δ (SD) <sup>c</sup>                       | -250 (417)          | -248 (424)             | <0.001 | -188 (432)       | -252 (421)          | <0.001 | -239 (466)  | -314 (506)  | <0.001 |
| FVC ml/year, mean Δ (SD) <sup>c</sup>                          | -47 (79)            | -46 (80)               | <0.001 | -35 (81)         | -47 (80)            | <0.001 | -44 (86)    | -59 (96)    | <0.001 |
| SGRQ score, mean Δ (SD) <sup>c</sup>                           | -0.57 (17)          | 0.29 (15)              | 0.57   | -2.22 (18)       | 0.39 (15)           | 0.52   | -1.09 (17)  | 1.84 (15)   | 0.80   |
| MMRC dyspnea scale, mean Δ (SD) <sup>c</sup>                   | -0.05 (1.13)        | 0.07 (1.24)            | 0.15   | -0.02 (1.26)     | 0.07 (1.23)         | 0.61   | 0.09 (1.26) | 0.22(1.29)  | <0.001 |
| Δ 6 minute walk (SD) <sup>c</sup>                              | -154 (333)          | -129 (363)             | <0.001 | -151 (385)       | -130 (360)          | <0.001 | -156 (356)  | -189 (370)  | <0.001 |
| <u>Chest CT Scan Measurements</u>                              |                     |                        |        |                  |                     |        |             |             |        |
| PRM Emphysema % at -950HU, mean Δ (SD) <sup>c</sup>            | 0.45 (4)            | 0.71 (3)               | <0.001 | 0.61 (4)         | 0.68 (3)            | <0.001 | 1.14 (5)    | 2.14 (5)    | <0.001 |
| Adjusted density, mean Δ (SD) <sup>c</sup>                     | -0.05 (12)          | -0.83 (11)             | <0.001 | -1.33 (12)       | -0.72 (11)          | <0.001 | -2.05 (11)  | -3.32 (11)  | <0.001 |
| Gas Trapping %, Exp – 856HU, mean Δ (SD) <sup>c</sup>          | 1.14 (9)            | 1.21 (9)               | <0.001 | 1.19 (9)         | 1.19 (9)            | <0.001 | 1.57 (11)   | 3.72 (10)   | <0.001 |
| PRM functional SAD, mean Δ (SD) <sup>c</sup>                   | 1.09 (7)            | 0.92 (7)               | <0.001 | 0.97 (8)         | 0.93 (7)            | <0.001 | 0.96 (9)    | 2.12 (8)    | <0.001 |
| SRWA-Pi10 (SD), mean Δ (SD) <sup>c</sup>                       | 0.06 (0.29)         | 0.04 (0.30)            | <0.001 | 0.07 (0.33)      | 0.04 (0.30)         | 0.01   | 0.08 (0.36) | 0.03 (0.34) | <0.001 |

Abbreviations: COPD chronic obstructive pulmonary disease; ACO Asthma-COPD overlap; P p-value; yr year; SD standard deviation; FEV<sub>1</sub> forced expiratory volume in the first second; BD bronchodilator; FVC forced vital capacity; SGRQ St. George's Respiratory Questionnaire; MMRC Modified Medical Research Council; CT computed tomography; PRM parametric response mapping; HU Hounsfield units; Exp Expiration; SAD small airways disease; SRWA-Pi10 square root wall area of a hypothetical airway with 10mm internal perimeter. Univariate analysis with: <sup>a</sup> Chi-square, <sup>b</sup> Wilcoxon rank sum test, <sup>c</sup> t-test.

**e-Table 2:** Exacerbations in COPD Subjects with Childhood Pneumonia and Childhood Asthma

|                                                                          | Childhood Pneumonia | No Childhood Pneumonia | Impact of Childhood Pneumonia <sup>a</sup> |               |      | Childhood Asthma | No Childhood Asthma | Impact of Childhood Asthma <sup>a</sup> |               |      |
|--------------------------------------------------------------------------|---------------------|------------------------|--------------------------------------------|---------------|------|------------------|---------------------|-----------------------------------------|---------------|------|
|                                                                          | N = 175             | N = 1429               | OR                                         | 95% CI        | P    | N = 152          | N = 1446            | OR                                      | 95% CI        | P    |
| Had a severe COPD exacerbation in prior yr (%) <sup>b,e,f,g,h</sup>      | 37 (21%)            | 258 (18%)              | 1.29                                       | (0.85 - 1.92) | 0.22 | 29 (19%)         | 265 (18%)           | 0.96                                    | (0.61 - 1.48) | 0.86 |
| Number of COPD exacerbations in prior yr, mean (SD) <sup>c,e,f,g,h</sup> | 0.77 (1.06)         | 0.57 (1.07)            | $\beta$                                    | SE            | P    | 0.74 (1.19)      | 0.58 (1.05)         | $\beta$                                 | SE            | P    |
| FEV <sub>1</sub> post-BD % predicted, mean $\Delta$ (SD) <sup>d,e</sup>  | -2.24 (11)          | -2.74 (11)             | 0.49                                       | 0.88          | 0.58 | -1.81 (11)       | -2.72 (11)          | 0.92                                    | 0.93          | 0.32 |
| FEV <sub>1</sub> post-BD mL, mean $\Delta$ (SD) <sup>d,e,f,i</sup>       | -180 (269)          | -186 (313)             | 11.52                                      | 25.06         | 0.65 | -147 (310)       | -188 (307)          | 36.27                                   | 26.50         | 0.17 |
| FVC post-BD % predicted, mean $\Delta$ (SD) <sup>d,e</sup>               | -3.09 (13)          | -3.72 (14)             | 0.61                                       | 1.12          | 0.59 | -1.63 (14)       | -3.77 (14)          | 2.14                                    | 1.18          | 0.07 |
| FVC post-BD mL, mean $\Delta$ (SD) <sup>d,e,f,i</sup>                    | -296 (462)          | -307 (507)             | 19.68                                      | 41.43         | 0.63 | -213 (480)       | -313 (502)          | 91.64                                   | 43.73         | 0.04 |

Abbreviations: *COPD* chronic obstructive pulmonary disease; *P* p-value; *yr* year; *SD* standard deviation. <sup>a</sup> Each row is a separate model: <sup>b</sup> Logistic regression with odds ratio (OR), 95 % confidence interval (CI); <sup>c</sup> Linear regression with beta coefficient ( $\beta$ ), standard error (SE) and <sup>d</sup> Linear mixed model with beta coefficient ( $\beta$ ), standard error (SE). Adjusted for: <sup>e</sup> pack years of smoking; <sup>f</sup> gender, age, race; <sup>g</sup> FEV<sub>1</sub> % predicted; <sup>h</sup> current smoking; <sup>i</sup> height.
